# Supplementary material for: Associations of tissue damage induced inflammatory plasticity in masseter muscle with the resolution of chronic myalgia
Source: PubMed Central journal article supplement (PMC10716154; doi:10.1038/s41598-023-49280-1), 2023-12-12
Supplement: 41598_2023_49280_MOESM1_ESM.pdf [file 41598_2023_49280_MOESM1_ESM.pdf]

## **Legends to Supplementary Figures:**

### **Supplementary Figure 1: Raw data on gating strategy for flow cytometry**

Gating strategy for single-cell suspension from the MM at 1d post-vehicle (Veh) or CFA single intramuscular treatment. The strategy shows live singlets and different immune cells were gated from single-cell suspension. Abbreviations are SSC-A - side angle scattered area; FSC-A - forward angle scattered area; CD45<sup>+</sup> - immune cells; Mo - monocytes, Nph – neutrophils, CD3 – T-cells.

### **Supplementary Figure 2: Immune cell profiles in CFA and Col treated MM at post-hypersensitivity resolution time points.**

**(A)** Immune cell counts per 10<sup>4</sup> CD45<sup>+</sup> cells in male MM at 5d post-vehicle (Veh) or CFA single intramuscular treatment. **(B)** Immune cell counts per CD45<sup>+</sup> cells in MM at 14d post-vehicle (Veh), Col (0.2U) or Col (10U) single intramuscular treatment. DCs – dendritic cells; Mph – macrophages; iMph - inflammatory macrophages; Mo – monocytes; iMo - inflammatory monocytes; NK – natural killer cells; B – B-cells; T – T-cells and Neu – neutrophils. Statistic is 2-way ANOVA (\* p<0.05; # p<0.0001; n=3-6).

**CFA**

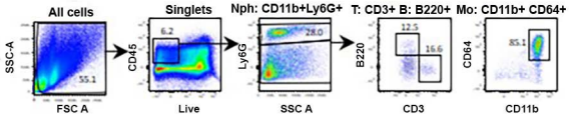

**Veh**

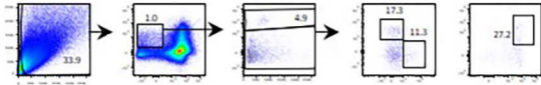

**Supplementary Figure 1**

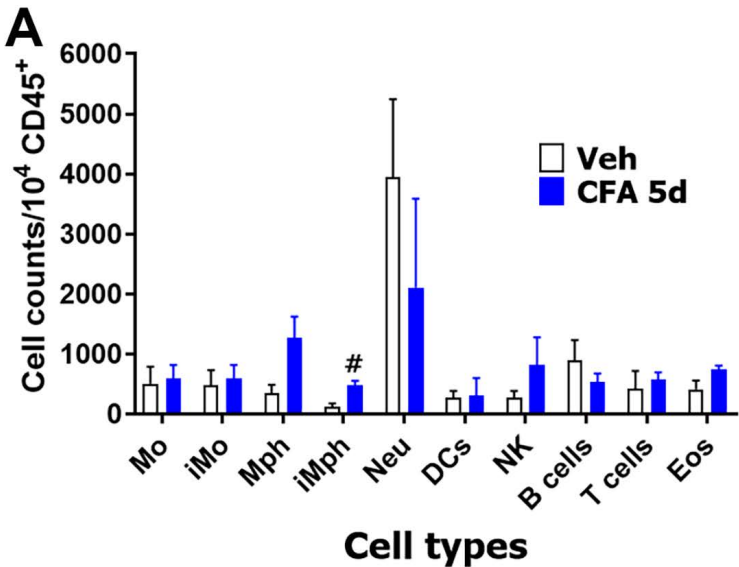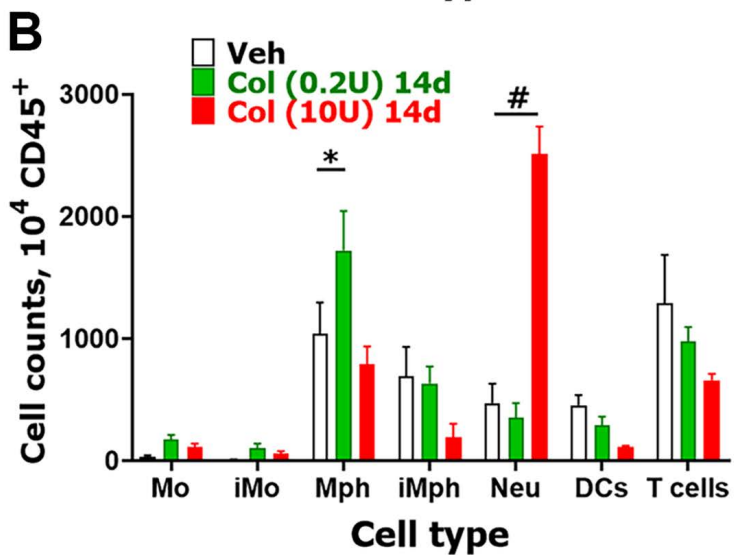

Supplementary Figure 2
